# Supplementary material
Source: publisher figshare collection journal article supplement (https://acs.figshare.com/ndownloader/files/4717066)
Supplement: Supplementary file 1 [file 4717066]

## Detailed Materials and Methods

### Animals

*Marisa cornuarietis* used in this study were obtained from stocks bred at Brunel University, UK, which were originally derived from a stock maintained at Prof. Dr. Jörg Oehlmann's lab, Johann Wolfgang Goethe University Frankfurt am Main, Department of Ecology & Evolution, Frankfurt am Main, Germany.

### PCR amplification and cDNA cloning

A degenerate primer RT-PCR approach was employed to identify cDNAs encoding putative steroid receptors derived from *M. cornuarietis* total tissue extracts. Total RNA was isolated from reproductively mature female snails using the guanidinium thiocyanate-phenol-chloroform extraction described by Chomczynski and Sacchi (1), including a further precipitation step with 4 M lithium chloride. Messenger RNA was isolated from total RNA using the Nucleotrap mRNA purification kit (Macherey-Nagel). First strand cDNA synthesis was performed using Superscript III (Invitrogen) according to the manufacturer's instructions. First round PCR was performed using the degenerate primers 5'-CGC A(A, T)C (A, C, G, T)GG (A, C, G, T)TA (C, T)CA (C, T)TA (C, T)G G(A, C, G, T)G T-3' (sense) and 5'-GAA (A, C, G, T)CC (A, C, G, T)GG (A, G, T)AT (C, T)TT (C, T)TT (A, C, G, T)GC CCA-3' (antisense) at annealing temperatures of 50°C for 10 cycles followed by 55°C for 30 cycles. All degenerate PCR was performed using Platinum *Taq* (Invitrogen). PCR products were resolved on a 1.2% agarose/TBE gel, fragments of the expected size were excised and

1 purified using the Minelute gel extraction kit (Qiagen), ligated into pDrive vector  
2 (Qiagen) and transformed into EZ competent cells (Qiagen). Blue/white screening  
3 and colony PCR check were used to select positive clones containing fragments of the  
4 expected size. Selected colonies were purified using Qiaprep Miniprep kit (Qiagen)  
5 and sequenced using the Amersham Cycle Sequencing kit with <sup>32</sup>P. Sequencing  
6 revealed that the cloned fragments were putative ER and ERR orthologue transcripts.

7

8 To obtain further sequence 3' of an original degenerate fragment encoding a putative  
9 ER orthologue transcript, a gene specific sense primer was designed (5'-AAC TGC  
10 ACT ATA GAC AAA CAC C-3') and used with a degenerate antisense primer (5'-  
11 A(A, G)C ATC TC(C, G) (A, G)(C, T)(C, G) A(A, G)(C, G) AGG TC-3') in PCR  
12 with an annealing temperature of 58°C for 30 cycles. Complete 3' sequence  
13 (including stop-codons and 3' untranslated regions) of the putative ER and ERR  
14 orthologue transcripts were elucidated by 3' RACE (rapid amplification of cDNA  
15 ends). Briefly cDNA was synthesised by Superscript III reverse transcriptase  
16 (Invitrogen) using the Invitrogen 3' RACE adapter primer. PCRs were performed  
17 using gene-specific primers (ER: 5'-GCA GGA GAG CGC GGC ATT GCT TAC  
18 TTC C-3'; ERR 5'- ATG GTG CAG CCC GTG GTA TCG-3') with an Abridged  
19 Universal Amplification Primer (Invitrogen) at an annealing temperature of 62°C for  
20 30 cycles. Extended 5' sequence information was attained with the SMART RACE  
21 cDNA Amplification kit (Clontech) using gene-specific primers (ER 5'-ACA TTT  
22 GCG TAG TCG ACA TGC-3'; ERR 5'- TCC AAC CGC ACT CCT TCT CTA AG-  
23 3'. Cloning was performed as described above and sequencing was conducted using  
24 the dideoxy method at MWG Biotech laboratories. Different isoforms of 5' putative

1 ER transcript fragments were isolated using this method including 1 with a putative  
2 start codon located further upstream than the other isoforms.  
3  
4 The full translated region of the shorter ER orthologue coding sequence was verified  
5 by PCR using the specific primers 5'-TGC TGA TCA CAC TAA TGG CGG-3'  
6 (sense) and 5'-GGT GAT CTT GTA GAG CCT TTC TT-3' (antisense) at an  
7 annealing temperature of 55°C for 30 cycles. Full ERR coding sequence was also  
8 verified by PCR using specific primers 5'- ACC ACT GGG GAC GCT GTG -3'  
9 (sense) and 5'- GGA ATC TGC CTC CAG CAT TTC TA -3' (antisense) at an  
10 annealing temperature of 60°C for 30 cycles. Specific PCR was performed using *Pwo*  
11 Superyield polymerase (Roche). Fragments of the expected size were gel-purified as  
12 described above, ligated into Zeroblunt vector (Invitrogen) and transformed into  
13 TOP10 chemically competent cells (Invitrogen). Kanamycin-resistant colonies were  
14 checked for the presence of vector containing a DNA insert of the expected size by  
15 colony PCR. Positive clones were sequenced by the dideoxy method at MWG  
16 Biotech laboratories.

## 18 **Phylogenetic analyses**

20 Initial structural analyses and BLAST (basic local alignment search tool) queries were  
21 performed using the NCBI (National Center for Biotechnology Information) server  
22 (<http://www.ncbi.nlm.nih.gov>). Non-*M. cornuarietis* amino acid sequences included  
23 in phylogenetic analyses conducted were obtained via Entrez on the NCBI server.  
24 Multiple alignments were performed using Clustal W (2). Phylogenetic tree  
25 construction was performed by maximum likelihood using PhyML (3, 4).

## Expression plasmids

The full coding regions of mcER-like (short protein-coding isoform) and mcERR were directionally cloned into pSG5 expression plasmid (Stratagene) by *EcoR* I/*Bam*H I restriction digestion and ligation. Briefly, the mcER-like coding region was isolated by PCR using the primers 5'-TAGgaattcATGCCCAGCCAGTCCCTG-3' (sense) and 5'-CGCggatccCTACACATATGGATTCAT-3' (antisense). McERR coding region was isolated by PCR using the primers 5'3' (sense) and 5'3' (antisense). The sense primers included an *EcoR* I restriction site and the antisense primers included a *Bam*H I restriction site (indicated in lower case). PCR was performed using *Pwo* Superyield polymerase (Roche). Cycling conditions used included an annealing temperature of 65°C for 30 cycles. Full-length verified clones described above were used as a template for use in PCR.

## Ligand-binding

Binding of [2, 4, 6, 7-<sup>3</sup>H] 17β-estradiol to mcER-like and mcERR was assessed in triplicate by radio-ligand binding assay using the method described by Routledge et al (5). McER-like and mcERR recombinant proteins were synthesised from pSG5-mcER-like and pSG5-mcERR using the TNT T7 Quick-coupled transcription/translation system (Promega). Size and integrity of protein products were checked by parallel protein syntheses incorporating Redivue <sup>35</sup>S methionine (Amersham), which were subsequently analysed by 10% SDS-polyacrylamide gel electrophoresis and autoradiography.

1 Translation products were diluted 20-fold in ligand-binding buffer (20 mM HEPES,  
2 1.5 mM EDTA, 0.1% BSA, 0.25 mM DTT, 10% glycerol) and 50 µl aliquots were  
3 incubated for 16 h at 4°C in the presence of [2, 4, 6, 7-<sup>3</sup>H] 17β-estradiol (evaporated  
4 to dryness in tubes from ethanol stock) over a range of final concentrations from 0.3  
5 to 9.6 nM. Following incubation, free estradiol was removed by addition of 50 µl ice-  
6 cold DCC (0.1 g Dextran 70, 1.0 g charcoal (Norit A; Sigma), 4 ml 1 M Tris pH7.4,  
7 0.8 ml 0.5 M EDTA, H<sub>2</sub>O to 400 ml). This mixture was incubated on ice for 5  
8 minutes and then separated by centrifugation at 4,000 x g for 2 mins. 80 µl of  
9 supernatant was removed, added to 4 ml of Liquiscint (National Diagnostics), mixed  
10 and analysed in a TRI-CARB 200A liquid scintillation analyser (Packard).  
11 Background radioactivity was assessed by analysis of negative controls, which  
12 contained product from transcription/translation procedure performed using empty  
13 pSG5 vector. Transcription/translation product from reaction containing pSG5-  
14 mouseERα (a gift from Prof. Malcolm Parker) was used as a positive control.  
15 Specific protein-specific binding was calculated by subtracting background  
16 radioactivity from total measured radioactivity and results were normalised to the  
17 maximum [2, 4, 6, 7-<sup>3</sup>H] 17β-estradiol binding observed to the positive control.

18

## 19 **Quantitative and semi-quantitative PCR**

20

21 Whole albumen gland (female), capsule gland (female), cephalic tentacle, cerebral  
22 ganglia, gonad-digestive complex, and penis sheath complex (male) were dissected  
23 from individual snails along with sections of foot and lung tissue. All tissue was  
24 snap-frozen in liquid nitrogen immediately following dissection. Total RNA was  
25 isolated from individual organs from 5 replicate individuals, using Tri-Reagent

1 (Sigma), according to the manufacturers recommended protocol. All total RNA  
2 samples were treated with *DNase I* (Invitrogen) to remove any traces of genomic  
3 DNA. To determine absolute amounts of transcripts, RNA standards were  
4 synthesised *in vitro* from DNA templates representing a 248-base fragment of the  
5 *mcER-like* 3' coding region/3' untranslated region and a 115-base fragment of the  
6 *mcERR* 3' untranslated region. The Riboprobe *in-vitro* Transcription System  
7 (Promega) was utilized and this included a *DNase I* treatment step. Real-time PCR  
8 was carried out using the one-step QuantiTect SYBR Green RT-PCR kit (Qiagen)  
9 with an ABI PRISM 7900 Sequence Detection System (Applied Biosystems).  
10 Amplification was carried out in 96-well plates, in a total volume of 25 µl containing  
11 QuantiTect SYBR Green RT-PCR mix (12.5 µl), 0.5 µM final concentration of each  
12 primer, QuantiTect RT Mix (0.25 µl), and RNA standards ( $5 \times 10^7$  –  $5 \times 10^2$ ) molecules  
13 or unknown RNA sample (50 ng). Primer sequences for the *mcER-like* target gene and  
14 the standard were 5'-ACT TGC TCA CCG AGA TGC TT-3' (sense) and 5'-CCC  
15 AGC CTT GCA GTC TAA AG-3' (antisense). Amplification conditions for *mcER-*  
16 *like* real-time PCR were: reverse transcription for 30 min at 50°C, inactivation for 15  
17 min at 95°C, followed by PCR amplification: 40 cycles of 15 s at 94°C, 30 s at 55°C  
18 and 40 s at 72°C. Primer sequences for the *mcERR* target gene and standard were 5'-  
19 CAT TTT CCC GTC GAC TCT TG-3' (sense) and 5'-CTG CAT ATC CTC CCT  
20 TTG GA-3' (antisense). Amplification conditions for *mcERR* real-time PCR were:  
21 reverse transcription for 30 min at 50°C, inactivation for 15 min at 95°C, followed by  
22 PCR amplification: 40 cycles of 15 s at 94°C, 30 s at 60°C and 30 s at 72°C. To  
23 confirm specificity, PCR products were subjected to melting curve analysis, and  
24 subsequent agarose gel electrophoresis and sequence analysis. Each experiment  
25 included absolute negative controls (no template), no reverse transcriptase controls

1 and negative tissue controls (RNA isolated from fathead minnow testis). All  
 2 determinations were carried out in triplicate. A standard curve of the threshold cycle  
 3 ( $C_t$ ) value obtained from the serially diluted RNA standards was compiled.  $C_t$  values  
 4 from the samples were plotted on the standard curve, and from this the number of  
 5 target RNA copies in each sample was calculated.

6 Semi-quantitative RT-PCR was performed using the *ER-like* specific primers 5'-ACT  
 7 TGC TCA CCG AGA TGC TT-3' (sense) and 5'-CCC AGC CTT GCA GTC TAA  
 8 AG-3' (antisense) and the *ERR* specific primers 5'-TCC GAA GAG TTC ATC ATC  
 9 AAT CGT-3' (sense) and 5'-AAA GTG GGC TGA AGC GAA ACA A-3'  
 10 (antisense). Twenty five cycles were performed at an annealing temperature of 60°C.  
 11 Individual PCR samples contained equal volumes of 1<sup>st</sup> strand cDNA synthesized  
 12 from 500 ng *DNase* I-treated RNA template using methods described above.

13  
 14  
 15  
 16

## 15 **References**

- 17 1. Chomczynski, P. and Sacchi, N. Single-step method of RNA isolation by acid  
 18 guanidinium thiocyanate-phenol-chloroform extraction. *Anal. Biochem.* **1987**, *162*,  
 19 156-159.
- 20 2. Chenna, R.; Sugawara, H.; Koike, T.; Lopez, R.; Gibson, T.J.; Higgins, D.G.;  
 21 Thompson, J.D. Multiple sequence alignment with the Clustal series of programs.  
 22 *Nucleic Acids Res.* **2003**, *31*, 3497-3500.
- 23 3. Guindon, S. and Gascuel, O. A simple, fast, and accurate algorithm to estimate  
 24 large phylogenies by maximum likelihood. *Syst. Biol.* **2003**, *52*, 696-704.

1    4. Guindon, S.; Lethiec, F.; Duroux, P.; Gascuel, O. PHYML Online--a web server for  
2    fast maximum likelihood-based phylogenetic inference. *Nucleic Acids Res.* **2005**, *33*,  
3    W557-9.

4    5. Routledge, E.J.; White, R.; Parker, M.G.; Sumpter, J.P. Differential effects of  
5    xenoestrogens on coactivator recruitment by estrogen receptor (ER) alpha and  
6    ERbeta. *J. Biol. Chem.* **2000**, *275*, 35986-35993.

7
